# Supplementary material
Source: publisher figshare collection journal article supplement (https://karger.figshare.com/ndownloader/files/38891127)
Supplement: Supplementary file 1 [file 38891127]

# **Supplementary Table**

**Supplementary Table S1. List of antibodies and reagents for FACS analysis.**

| **Antibody** | **Clone** | **Manufacturer** |
| --- | --- | --- |
| FITC **Annexin V** | - | Biolegend |
| **7-AAD** | - | Sigma |
| **Propidium Iodide** | - | Sigma |
| AlexaFluor® 488 anti-mouse **CD3ε** | 145-2C11 | BioLegend |
| APC anti-mouse/human **CD11b** | M1/70 | BioLegend |
| APC/Cy7 anti-mouse/human **CD11b** | M1/70 | BioLegend |
| PE anti-mouse **CD45** | 30-F11 | BioLegend |
| Pacific Blue™ anti-mouse **CD69** | H1.2F3 | BioLegend |
| PE/Cy7 anti-mouse **CD94** | 18d3 | BioLegend |
| FITC anti-mouse **CD192 (CCR2)** | SA203G11 | BioLegend |
| BV510 anti-mouse **CD335 (NKp46)** | 29A1.4 | BioLegend |
| AlexaFluor® 647 Rat anti-mouse **Dectin-1** | 2A11 | AbD Serotec |
| PE anti-mouse **Dectin-1** | 2A11 | AbD Serotec |
| Anti-**mDectin-2/CLEC6A** APC conjugated | Antigen Affinity-purified Polyclonal Goat IgG | R&D Systems |
| FITC anti-mouse **F4/80** | BM8 | BioLegend |
| Recombinant anti-**IL-15** antibody | EPR22635-214 | Abcam |
| Pacific Blue™ anti-mouse **Ly-6G** | 1A8 | BioLegend |
| APC anti-mouse **Ly-6G/Ly-6C (Gr-1)** | RB6-8C5 | BioLegend |
| APC anti-mouse **NK-1.1** | PK136 | BioLegend |
| Brilliant Violet 421™ Donkey anti-rabbit IgG | Poly4064 | BioLegend |
